# Supplementary material for: Genetic and physical interactions between the organellar mechanosensitive ion channel homologs MSL1, MSL2, and MSL3 reveal a role for inter‐organellar communication in plant development
Source: PubMed Central journal article supplement (PMC6508831; doi:10.1002/pld3.124), 2019-03-04
Supplement: PLD3-3-e00124-s001.pdf [file PLD3-3-e00124-s001.pdf]

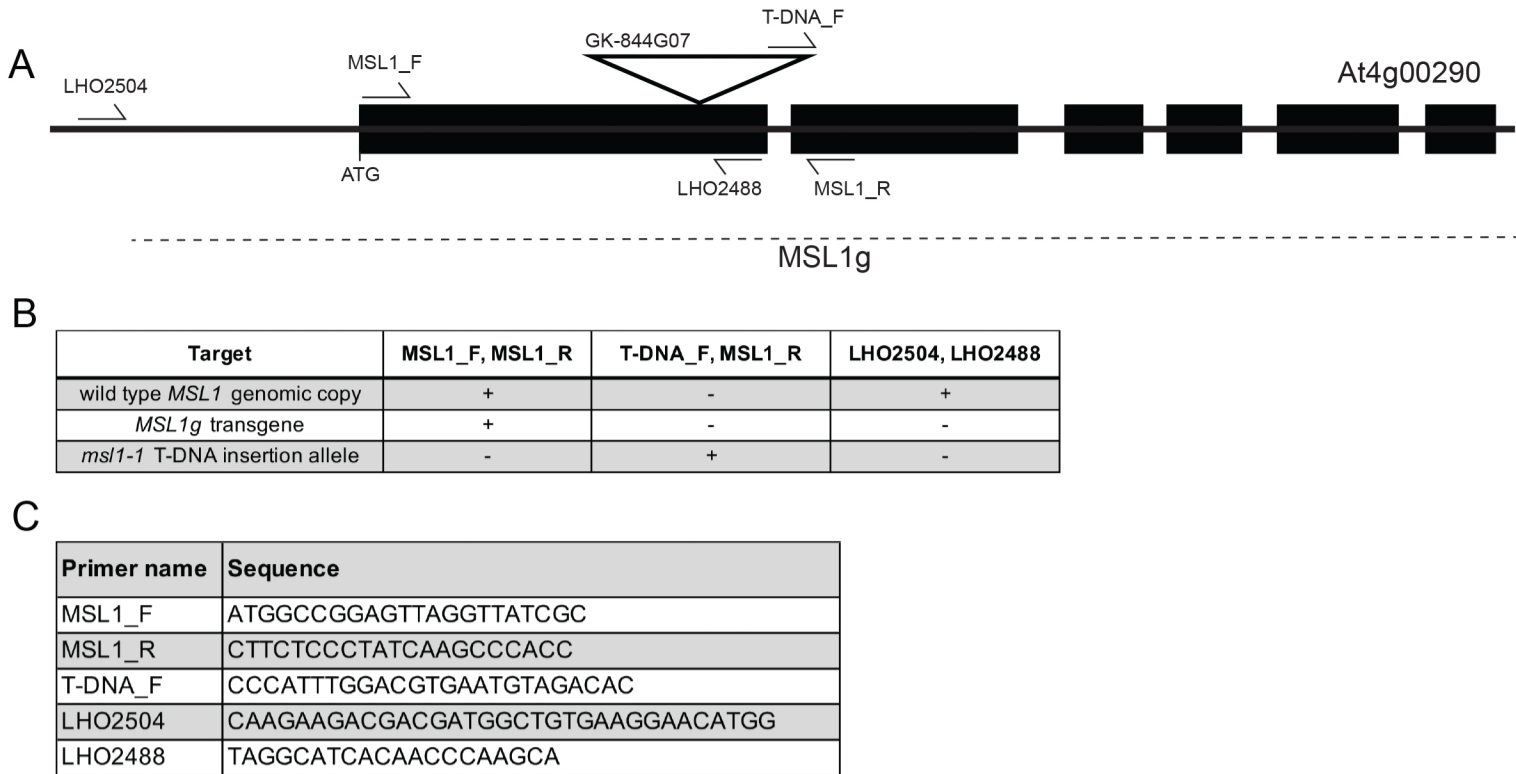

Figure S1. Primers involved in genotyping the genomic locus of *MSL1* in the presence of the *MSL1g* transgene. (A) Schematic of the *MSL1* gene and the location of primers used. Thick lines indicate exons and thin lines indicate introns. The inverted triangle indicates the insertion point of the T-DNA in the *ms1-1* mutant. Thin arrows (not to scale) indicate the approximate recognition sites of oligos used for genotyping. Dashed line indicates the sequence included in the *MSL1g* transgene. (B) Primer pairs used to distinguish the wild type genomic version of *MSL1*, the *MSL1g* transgene, and the *ms1-1* T-DNA insertion allele. (C) The sequences of primers used in (B) are shown.
